# Supplementary material
Source: PubMed Central journal article supplement (PMC3691851)

# A Simplified Procedure for the Synthesis of *N*-Methyl Cysteine<sup>†</sup>

Erik L Ruggles<sup>‡</sup>, Stevenson Flemer Jr.<sup>‡</sup>, and Robert J. Hondal<sup>\*‡</sup>

<sup>‡</sup>Department of Biochemistry, Given Laboratory, University of Vermont, 89 Beaumont Ave, Burlington, VT 05405

## TABLE OF CONTENTS

|                                                                   |       |
|-------------------------------------------------------------------|-------|
| NMR Spectra of Oxazolidinone <b>28</b>                            | S2-S4 |
| <sup>1</sup> H-NMR of Oxazolidinone <b>28</b>                     | S2    |
| <sup>13</sup> C-NMR of Oxazolidinone <b>28</b>                    | S3    |
| dept135-NMR of Oxazolidinone <b>28</b>                            | S4    |
| <br>                                                              |       |
| NMR Spectra of Fmoc-MeCys(S <sup>t</sup> Bu)-OH <b>29</b>         | S5-S7 |
| <sup>1</sup> H-NMR of Fmoc-MeCys(S <sup>t</sup> Bu)-OH <b>29</b>  | S5    |
| <sup>13</sup> C-NMR of Fmoc-MeCys(S <sup>t</sup> Bu)-OH <b>29</b> | S6    |
| dept135-NMR of Fmoc-MeCys(S <sup>t</sup> Bu)-OH <b>29</b>         | S7    |

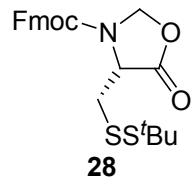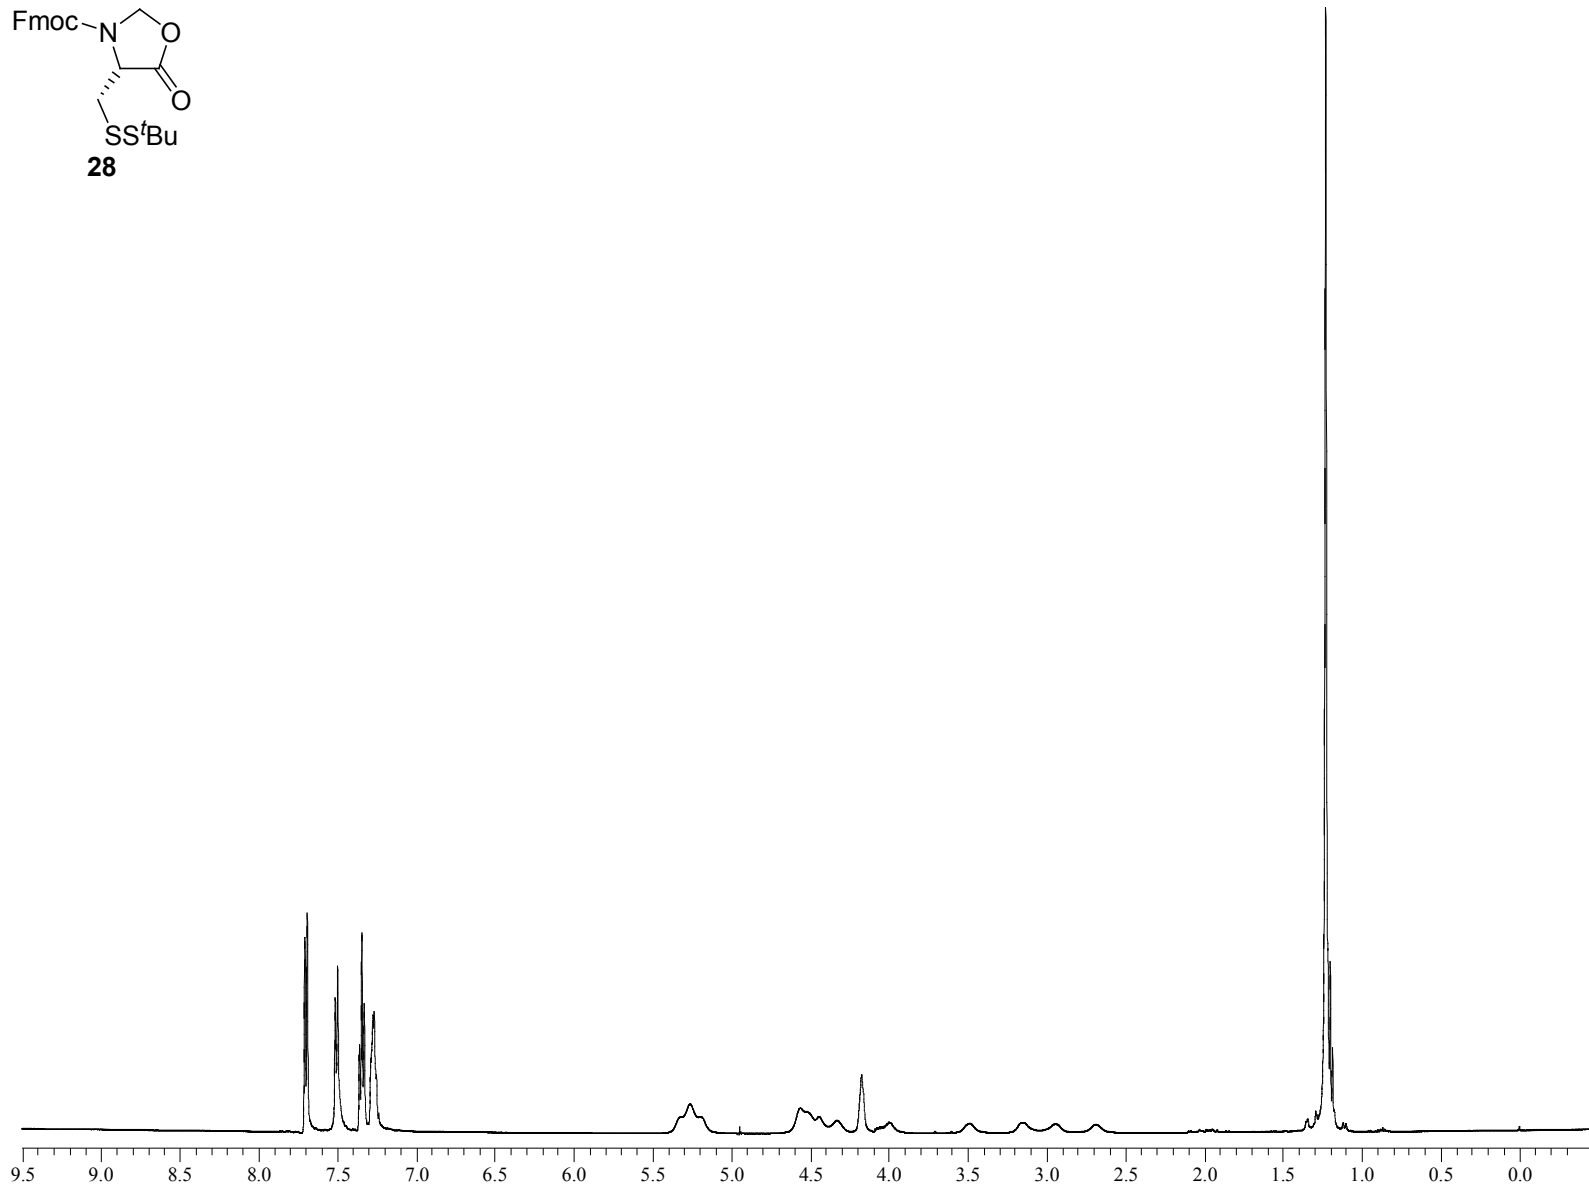

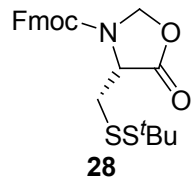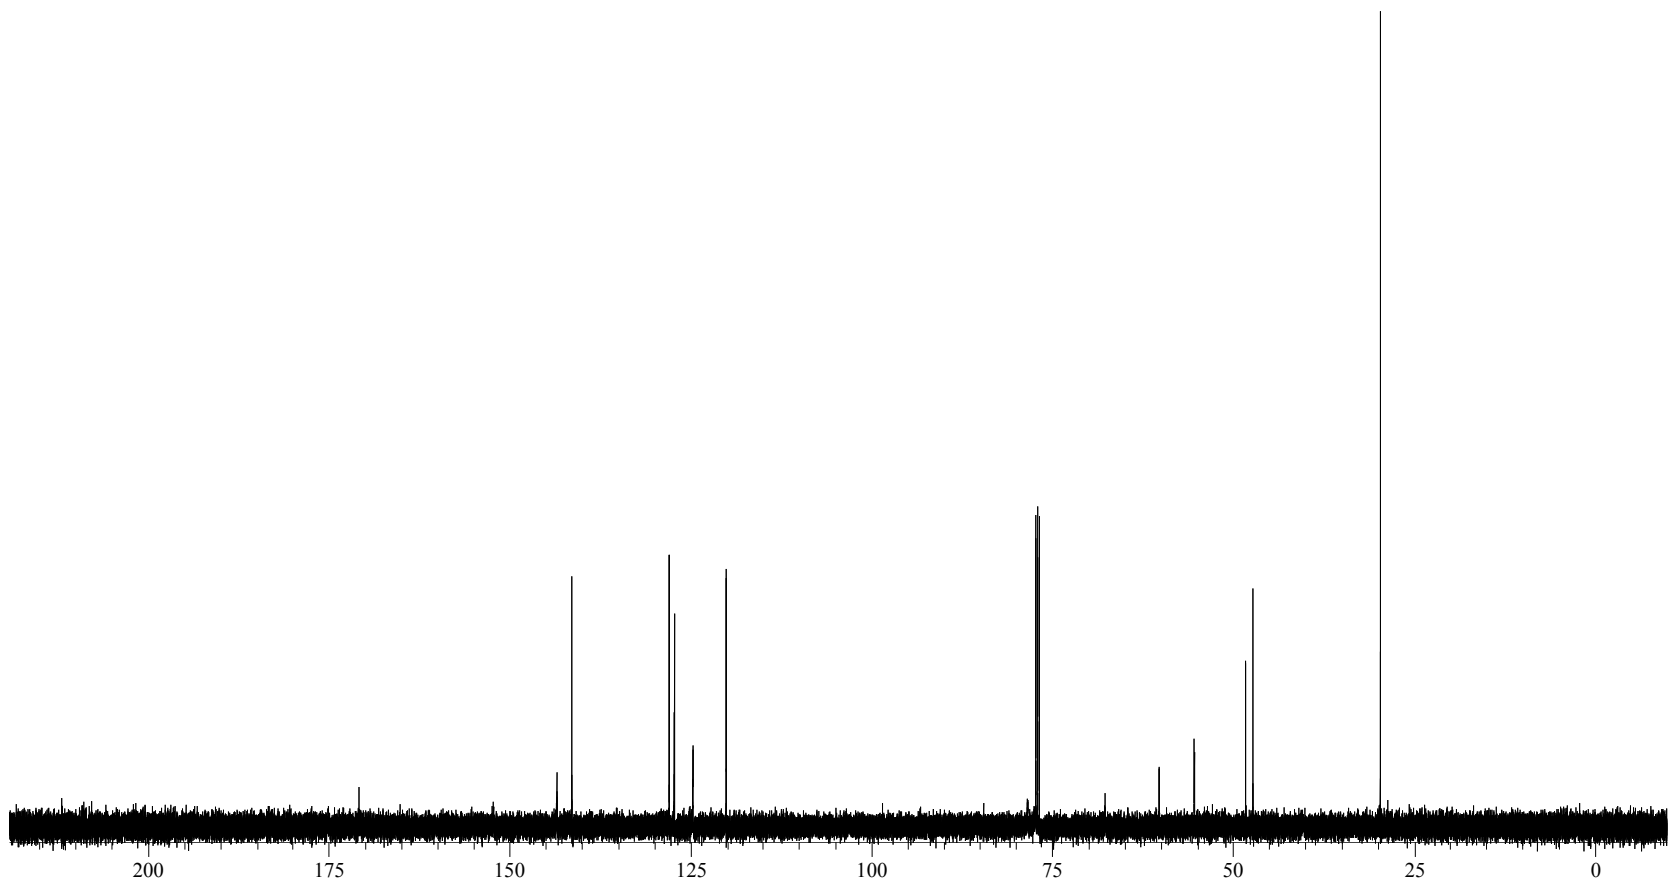

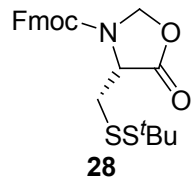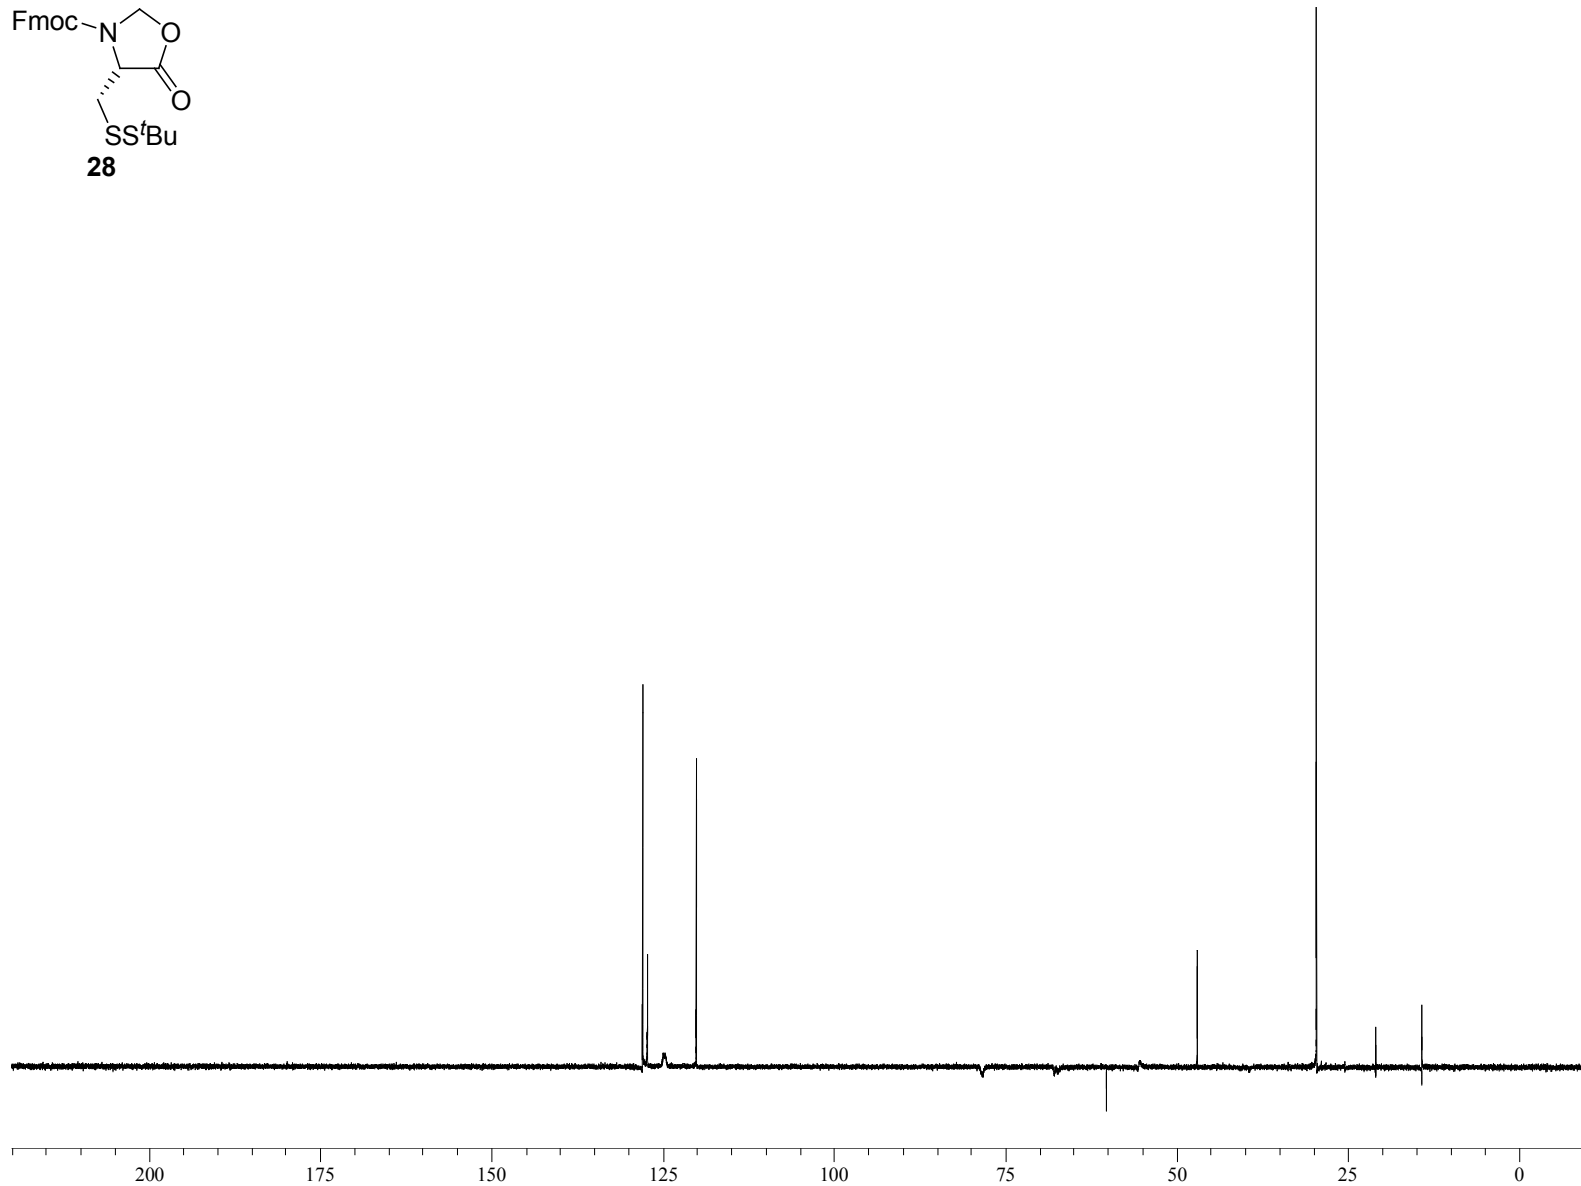

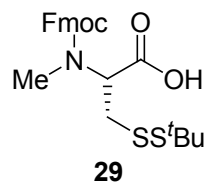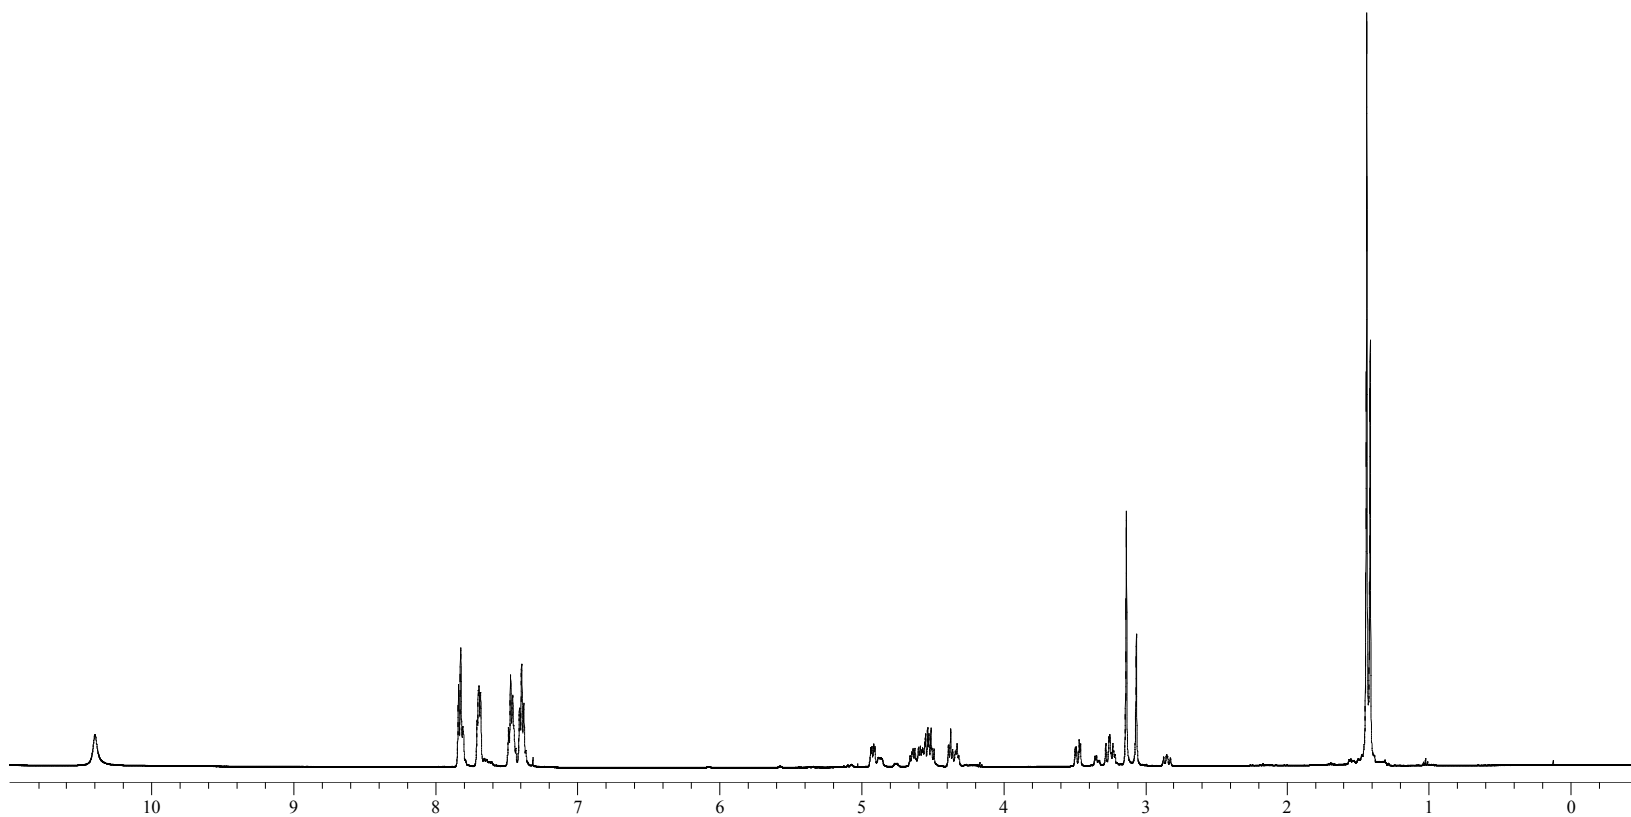

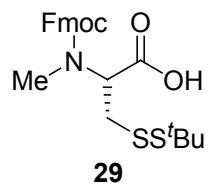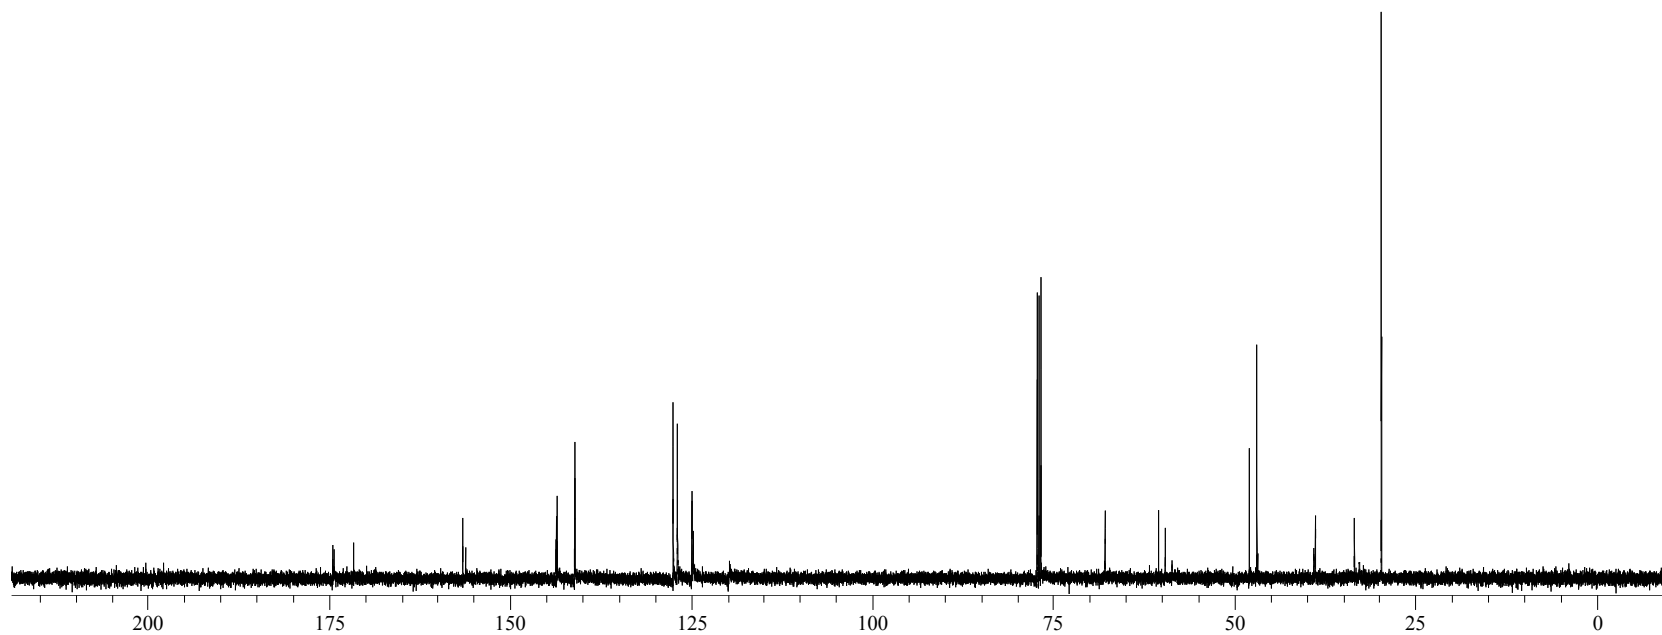

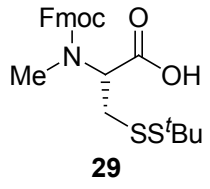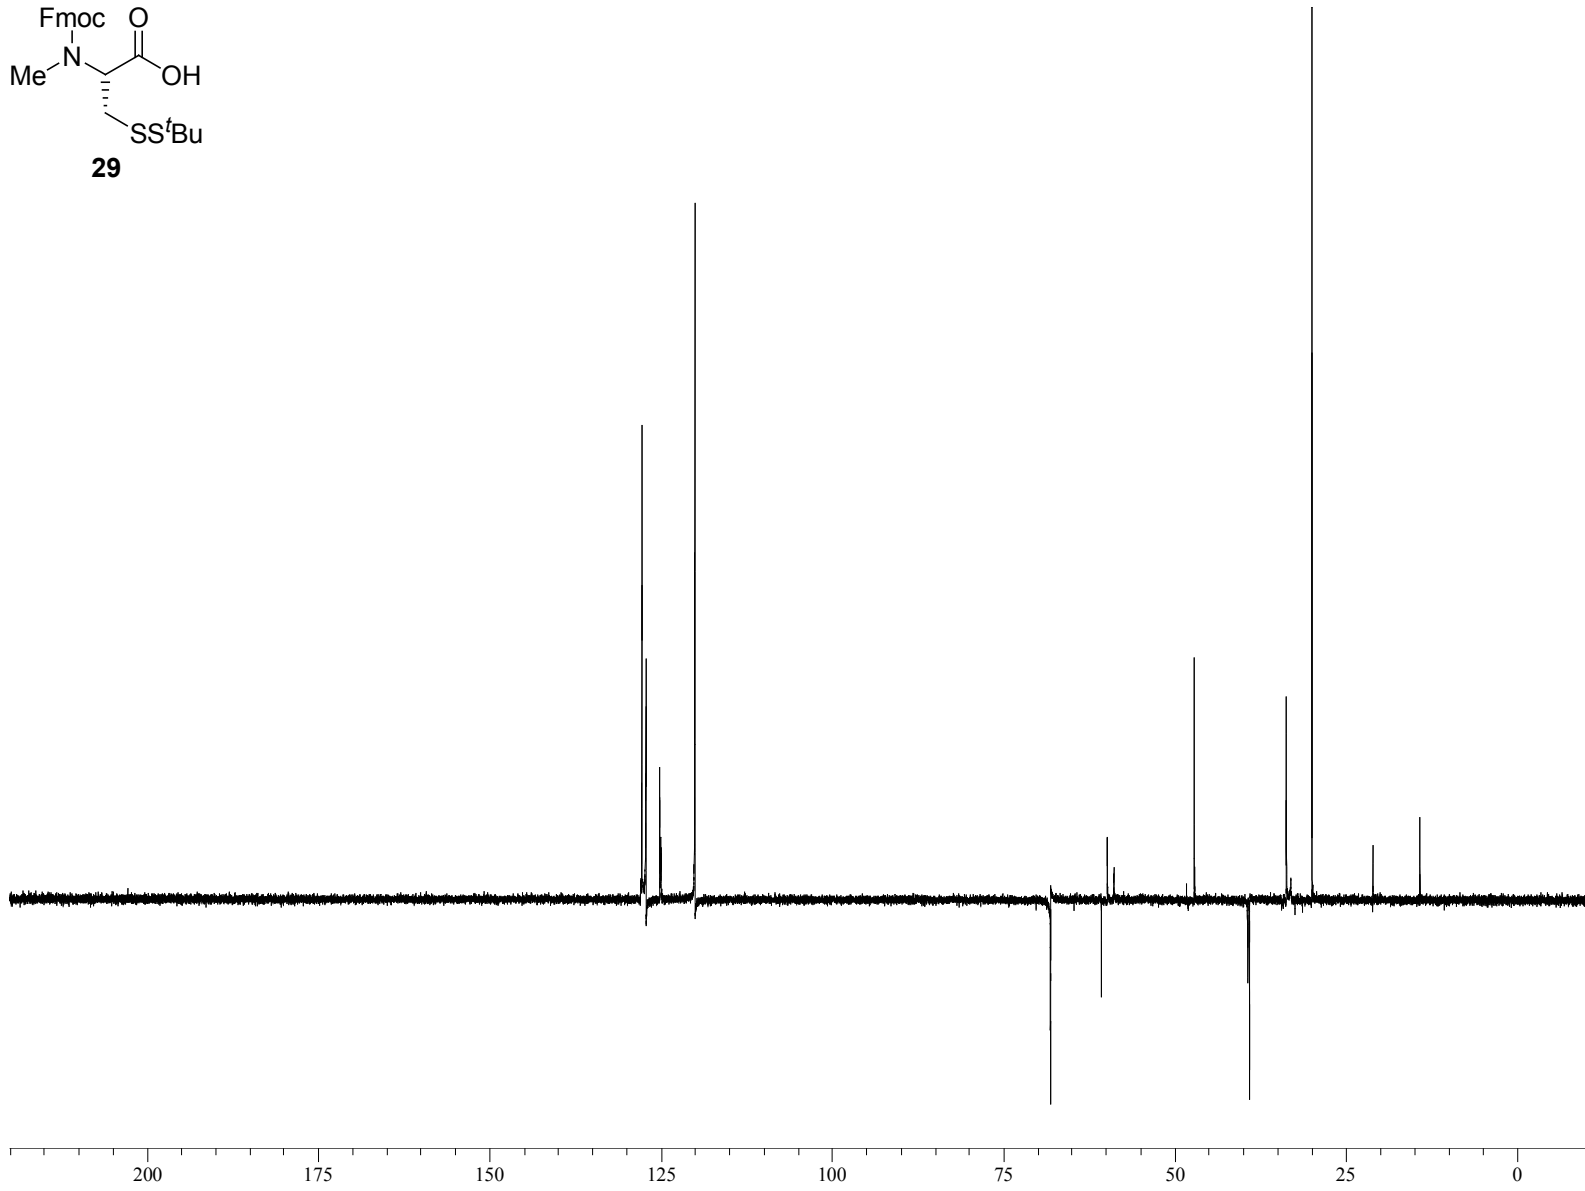

Supplement: NIHMS406964-supplement-supporting_information.pdf [file NIHMS406964-supplement-supporting_information.pdf]
